# Supplementary material for: A stimuli-responsive “smart probe” for selective monitoring of multiple-cations via differential analyses
Source: Royal Society of Chemistry journal article supplement (doi:10.1039/c3an00087g), 2013-01-01
Supplement: c3an00087g.pdf [file c3an00087g.pdf]

## Supporting Information

### Stimuli-responsive “smart probe” for selective monitoring of multiple-cations via differential analyses

Anup Kumar, Alok Kumar Singh and Tarkeshwar Gupta\*

Department of Chemistry, University of Delhi, Delhi-110 007, India.

*e-mail: tgupta@chemistry.du.ac.in*

**Material and Methods:** Most of the metal salts were purchased from BDH chemicals Ltd. and used as received. 4, 5-imidazoledicarboxylic acid, o-phenylenediamine and ortho-phosphoric acid were purchased from Alfa Aesar and Spectrochem respectively and used as received.  $\text{RuCl}_3 \cdot x\text{H}_2\text{O}$  was purchased from Sigma Adrich and stores in  $\text{N}_2$  atmosphere. Methanol, dichloromethane (DCM) and acetonitrile (HPLC grade) were purchased from Merck and distilled using reported methods<sup>S1</sup>. Water used for the experiment was double distilled. UV-Vis spectra were recorded using a JASCO UV-Vis-NIR spectrometer (670D) with a quartz cuvette (path length, 1cm). Fluorescence spectra were recorded on Varian Cary eclipse instrument. IR spectra were recorded on Perkin-Elmer FT-IR spectrophotometer in range  $400\text{-}4000\text{ cm}^{-1}$  using KBr as a medium. Mass spectra were recorded on THERMO finnigan LCQ advantage max ion trap mass spectrometer (MSAIF, CDRI, Lucknow, India). All  $^1\text{H}$  NMR spectra were recorded on Jeol JNMECX 400p spectrometer at room temperature using  $\text{DMSO-d}_6$ . All chemical shifts ( $\delta$ ) were recorded in ppm with reference to TMS and coupling constant (J) in Hz. X-ray diffraction data for **1** was collected on the Oxford Diffractometer at room temperature equipped with a CCD detector using graphite-monochromated Mo-  $\text{K}\alpha$  radiation ( $\lambda=0.71073\text{Å}$ ). The ligand 4-(1H-benzo[d]imidazol-2-yl)-1H-imidazole-5-carboxylic acid was synthesised by reported synthetic method<sup>S2</sup>. The precursor complex  $\text{cis-}[\text{Ru}(\text{bpy})_2\text{Cl}_2] \cdot 2\text{H}_2\text{O}$  was prepared according to the reported procedure<sup>S3</sup>.

**Synthesis of ruthenium complex of 4-(1H-benzo[d]imidazol-2-yl)-1H-imidazole-5-carboxylic acid (1).** The initial precursor  $\text{cis-}[\text{Ru}(\text{bpy})_2\text{Cl}_2] \cdot 2\text{H}_2\text{O}$  (50mg, 0.10 mmol)

in dry ethanol (10 ml) was stirred with  $\text{AgClO}_4$  (54.3mg, 0.26mmol) in nitrogen atmosphere for 30 min. A white colour precipitate was filtered off. Consequently, 4-(1H-benzo[d]imidazol-2-yl)-1H-imidazole-5-carboxylic acid (26 mg, 0.12 mmol) was added to the solution and refluxed for 12h under nitrogen atmosphere. The resulting solution was filtered and dried under vacuo, to yields orange-red colour microcrystalline solid. The solid product was recrystallized using acetonitrile/methanol (1:2) mixture. Yield: 48 mg (58%). IR (KBr):  $\nu$  ( $\text{cm}^{-1}$ ) = 1603 (C=O), 1422 (C=N). UV-Vis ( $\text{CH}_3\text{CN}$ ;  $\lambda$ , nm); ( $\epsilon$ ,  $\text{M}^{-1} \text{cm}^{-1}$ ): 290 (61,385), 318 (18,860), 354 (14,404), 489 (9645), ES-MS:  $m/z$  (%): 641(100) [ $\text{M}^+$ ], 526 (22) [ $\text{M}-\text{C}_7\text{H}_5\text{N}_2$ ], CV (vs Ag/AgCl):  $E_{1/2} = 0.81$  V ( $\text{Ru}^{2+/3+}$ ),  $\Delta E = 65.8$  mV,  $I_{pc}/I_{pa} = 1.1$ .

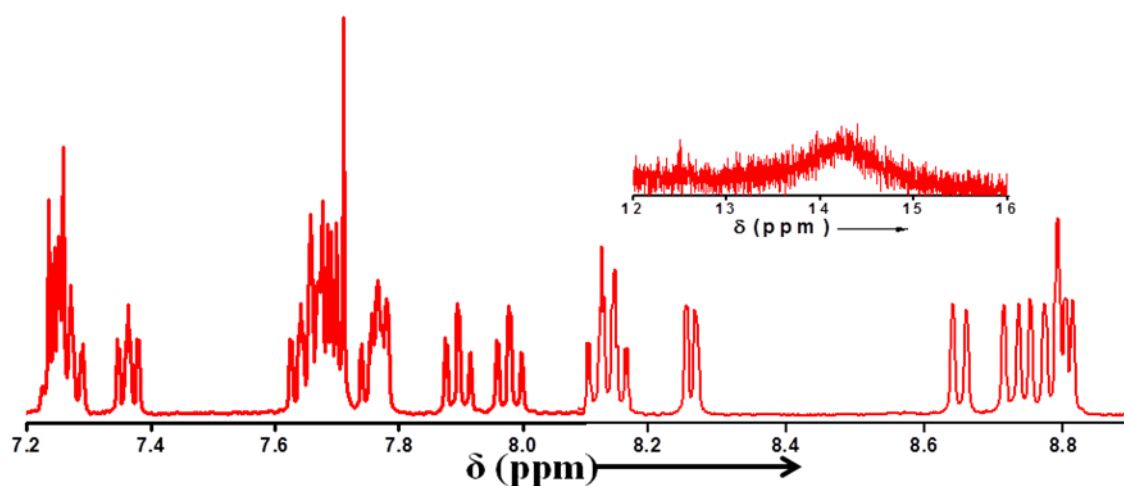

**Figure S1:**  $^1\text{H}$  NMR of **1** in  $\text{DMSO-d}_6$  at room temperature, inset highlighting the peak due to the NH proton.

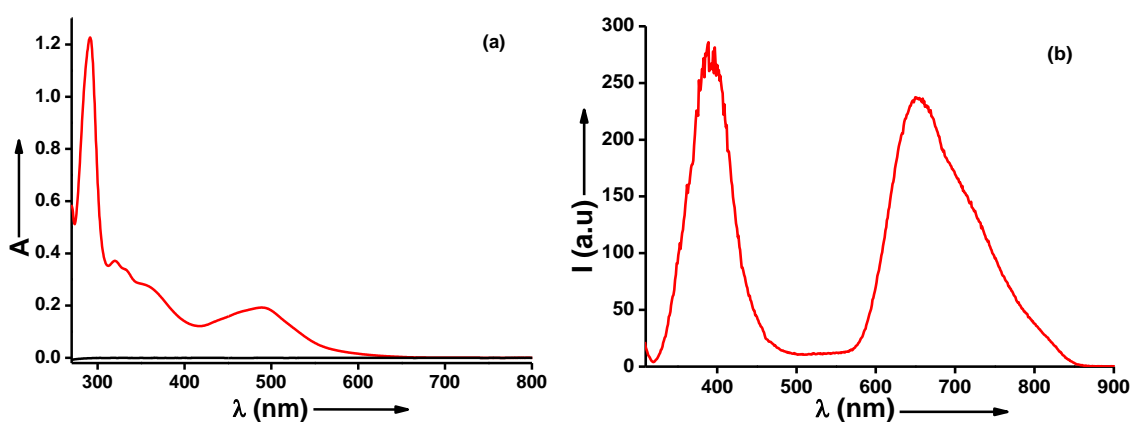

**Figure S2:** (a) UV-Vis spectra and (b) Emission spectra of **1** ( $2 \times 10^{-5}$  M) in acetonitrile at room temperature.

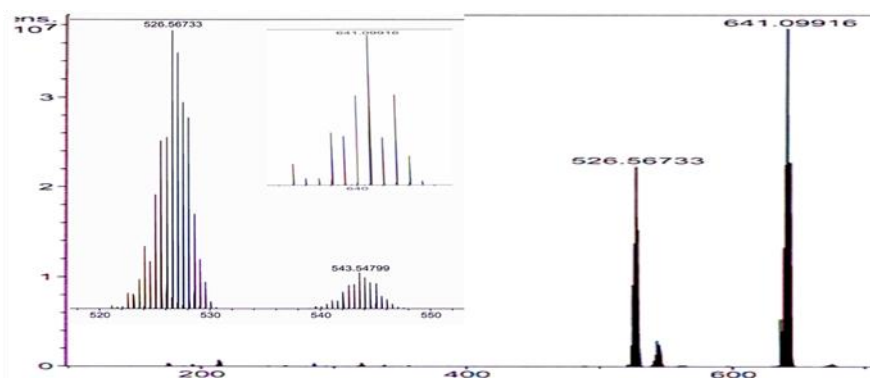

**Figure S3:** ESI-MS spectra of **1** showing possible fragmentation.

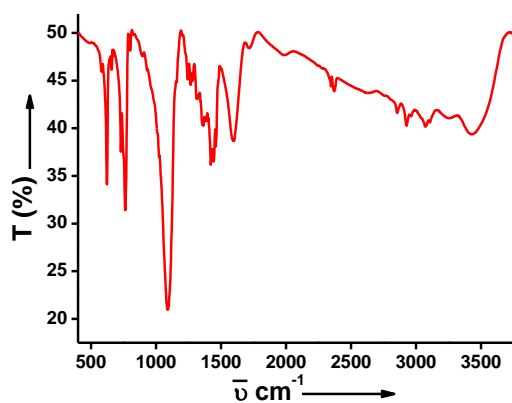

**Figure S4:** FTIR spectra of **1** in KBr medium.

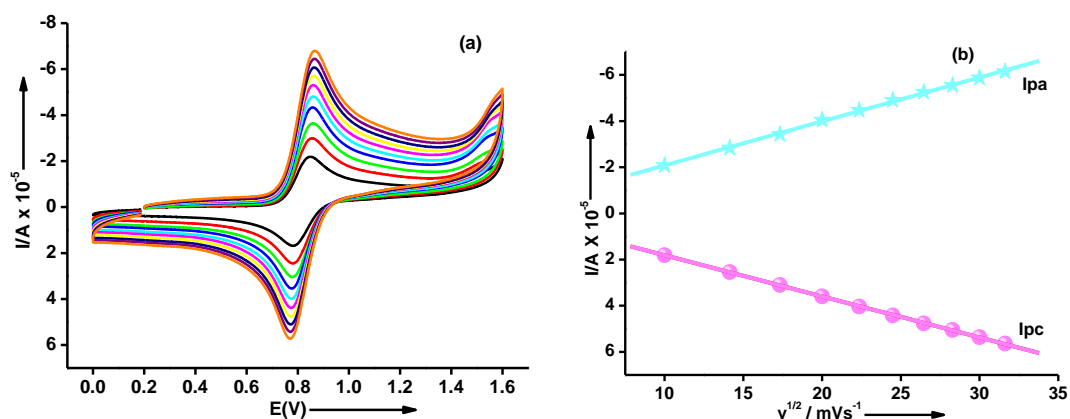

**Figure S5:** (a) Cyclic voltammogram of **1** ( $2 \times 10^{-5}$  M) in acetonitrile containing 1.0 M  $\text{Bu}_4\text{NClO}_4$  at scan rate from 100 to 1000  $\text{mV}$ . The glassy carbon was used as working electrode, platinum wire was used as counter electrode, and  $\text{Ag}/\text{AgCl}$  in 1.0 M  $\text{KCl}$

aqueous solution was used as reference electrode (b) Plot of current density as a function of scan rate.

### Crystallographic Information:

**X-ray Crystal structure determination:** Crystal suitable for structure determination was obtained by diffusion of diethyl ether over saturated solution of **1** in acetonitrile for one/two week at room temperature. The structure was solved using direct and Fourier methods and refined by full-matrix least squares based on  $F^2$  using WINGX software, which operated SHELX-97 software. The non-H atoms were refined anisotropically. The final least-squares refinement [ $I > 2\sigma(I)$ ] converged to reasonably good R values,  $R_1 = 0.0757$ ,  $wR_2 = 0.2455$  for **1**. The goodness of fit for 1.040 and the maximum and minimum peaks on the final difference Fourier map corresponding to 1.443 and  $-0.688\text{e}\text{\AA}^{-3}$  respectively. Complex **1** crystallized in the monoclinic form with space group  $C2/c$ .

### Selected Bond Angles and Bond lengths:

| Selected Bond Angles |            | Selected Bond Lengths |          |
|----------------------|------------|-----------------------|----------|
| N(4)-Ru(1)-N(5)      | 95.0(2)    | O(1)-Ru(1)            | 2.101(4) |
| N(4)-Ru(1)-N(6)      | 96.56(18)  | N(2)-Ru(1)            | 2.060(5) |
| N(5)-Ru(1)-N(6)      | 79.26(18)  | N(3)-Ru(1)            | 2.056(5) |
| N(4)-Ru(1)-N(3)      | 79.9(2)    | N(4)-Ru(1)            | 2.030(6) |
| N(5)-Ru(1)-N(3)      | 100.79(19) | N(5)-Ru(1)            | 2.034(4) |
| N(6)-Ru(1)-N(3)      | 176.4(2)   | N(6)-Ru(1)            | 2.041(4) |
| N(4)-Ru(1)-N(2)      | 168.52(17) |                       |          |
| N(5)-Ru(1)-N(2)      | 95.6(2)    |                       |          |
| N(6)-Ru(1)-N(2)      | 89.80(18)  |                       |          |
| N(3)-Ru(1)-N(2)      | 93.7(2)    |                       |          |
| N(4)-Ru(1)-O(1)      | 90.83(18)  |                       |          |
| N(5)-Ru(1)-O(1)      | 172.01(18) |                       |          |
| N(6)-Ru(1)-O(1)      | 94.68(16)  |                       |          |
| N(3)-Ru(1)-O(1)      | 85.58(16)  |                       |          |
| N(2)-Ru(1)-O(1)      | 79.10(17)  |                       |          |

### Summary of crystal data:

|                                                                                   |                                                                                                                                                                         |                  |
|-----------------------------------------------------------------------------------|-------------------------------------------------------------------------------------------------------------------------------------------------------------------------|------------------|
| Empirical formula                                                                 | C <sub>62</sub> H <sub>48</sub> Cl <sub>11</sub> N <sub>16</sub> O <sub>14</sub> Ru <sub>2</sub>                                                                        |                  |
| Formula weight                                                                    | 1476.74                                                                                                                                                                 |                  |
| Temperature                                                                       | 298 K                                                                                                                                                                   |                  |
| Wavelength                                                                        | 0.71073 Å                                                                                                                                                               |                  |
| Crystal system                                                                    | Monoclinic                                                                                                                                                              |                  |
| Space group                                                                       | C 2/c                                                                                                                                                                   |                  |
| Unit cell dimensions                                                              | a = 19.9067(8) Å                                                                                                                                                        | α = 90°.         |
|                                                                                   | b = 20.3667(6) Å                                                                                                                                                        | β = 117.057(5) ° |
|                                                                                   | c = 18.4436(7) Å                                                                                                                                                        | γ = 90°.         |
| Volume                                                                            | 6659.3(5) Å <sup>3</sup>                                                                                                                                                |                  |
| Z                                                                                 | 4                                                                                                                                                                       |                  |
| Density (calculated)                                                              | 1.473 Mg/m <sup>3</sup>                                                                                                                                                 |                  |
| Absorption coefficient                                                            | 0.569 mm <sup>-1</sup>                                                                                                                                                  |                  |
| F (000)                                                                           | 2996                                                                                                                                                                    |                  |
| Crystal size                                                                      | 0.22 x 0.16 x 0.14 mm <sup>3</sup>                                                                                                                                      |                  |
| Theta range                                                                       | 3.19 to 26.00°.                                                                                                                                                         |                  |
| Index ranges                                                                      | -23<=h<=24, -25<=k<=25, -22<=l<=22                                                                                                                                      |                  |
| Reflections collected                                                             | 31022                                                                                                                                                                   |                  |
| Independent reflections                                                           | 6537 [R (int) = 0.0284]                                                                                                                                                 |                  |
| Completeness to theta = 26.00°                                                    | 99.8 %                                                                                                                                                                  |                  |
| Absorption correction                                                             | Semi-empirical from equivalents                                                                                                                                         |                  |
| Max. And min. transmission                                                        | 0.9244 and 0.8848                                                                                                                                                       |                  |
| Refinement method                                                                 | Full-matrix least-squares on F <sup>2</sup>                                                                                                                             |                  |
| Data / restraints / parameters                                                    | 6537 / 0 / 439                                                                                                                                                          |                  |
| Goodness-of-fit on F <sup>2</sup>                                                 | 1.040                                                                                                                                                                   |                  |
| Final R indices [I > 2 sigma (I)]                                                 | R <sub>1</sub> = 0.0757, wR <sub>2</sub> = 0.2455                                                                                                                       |                  |
| R indices (all data)                                                              | R <sub>1</sub> = 0.0950, wR <sub>2</sub> = 0.2364                                                                                                                       |                  |
| Largest diff. peak and hole                                                       | 1.443 and -0.688 eÅ <sup>-3</sup>                                                                                                                                       |                  |
| aR <sub>1</sub> (F) = [Σ  F <sub>o</sub> - F <sub>c</sub>   /Σ F <sub>o</sub>  ]. | b wR <sub>2</sub> (F <sup>2</sup> ) = [Σw (F <sub>o</sub> <sup>2</sup> -F <sub>c</sub> <sup>2</sup> ) <sup>2</sup> /Σw (F <sub>o</sub> <sup>2</sup> )] <sup>1/2</sup> . |                  |

**Preparation of ppm-level solution of metal salts.** A stock solution of 1000 ppm of various metal salts of Hg(NO<sub>3</sub>)<sub>2</sub>.H<sub>2</sub>O, Ni(NO<sub>3</sub>)<sub>2</sub>.6H<sub>2</sub>O, MnCl<sub>2</sub>.4H<sub>2</sub>O, MgSO<sub>4</sub>.7H<sub>2</sub>O, AgNO<sub>3</sub>, KNO<sub>3</sub>, FeCl<sub>3</sub>, Cu(NO<sub>3</sub>)<sub>2</sub>.3H<sub>2</sub>O, Co(NO<sub>3</sub>)<sub>2</sub>.6H<sub>2</sub>O, Cd(NO<sub>3</sub>)<sub>2</sub>.4H<sub>2</sub>O, LiCl, CaCl<sub>2</sub>, Pb(NO<sub>3</sub>)<sub>2</sub>, Zn(NO<sub>3</sub>)<sub>2</sub>.6H<sub>2</sub>O and FeSO<sub>4</sub>.7H<sub>2</sub>O in dry acetonitrile/DMF/DCM were made by dissolving 10 mg of each metal salts in 10 ml of mixture of solvent. Further, the stock solution was diluted to 10 ppm by taking 50ul volume of stock solution (1000 ppm) and making up it in acetonitrile solution of **1** upto 5 ml. The solution was used for analyses.

**Detection procedure of ppm-levels of Pb<sup>2+</sup>, Zn<sup>2+</sup> and Fe<sup>2+</sup>:** A 5 ml solution of **1** (2 × 10<sup>-5</sup>M) was treated with 5ul stock solution (1000 ppm) of Pb<sup>2+</sup>/Zn<sup>2+</sup> (1.0 ppm in acetonitrile solution of **1**), mixed thoroughly, allowed to keep undisturbed for 3 minutes. Subsequently, emission spectra were recorded at room temperature using quartz cuvette. Further, 5 ul of Pb<sup>2+</sup>/Zn<sup>2+</sup> was added to same solution for 2, 3, 4, 5, 6, 7, 8, 9, and 10 ppm. In Contrast, the ppm levels of Fe<sup>2+</sup> was retained by addition of 50 ul of stock solution (1000 ppm) of Fe<sup>2+</sup> in 5

ml of **1** ( $2 \times 10^{-5}$  M) for 10 ppm and similarly higher concentration was maintained for analyses. The output signal was monitored w.r.t intensity of **1** at both bands.

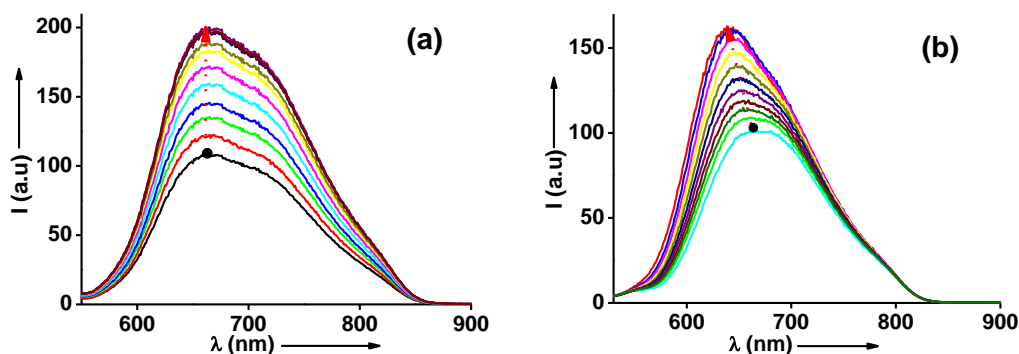

**Figure S6:** Emission intensity changes of **1** ( $2 \times 10^{-5}$  M in acetonitrile) upon addition of 1, 2, 3, 4, 5, 6, 7, 8, 9, 10 ppm of  $\text{Pb}^{2+}$  (a)/ $\text{Zn}^{2+}$  (b). The spectra were recorded after excitation at 489 nm.

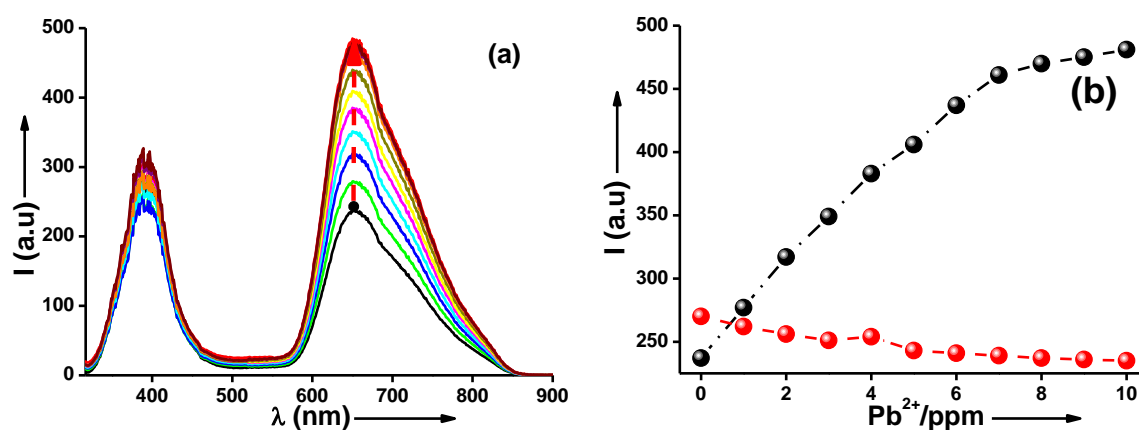

**Figure S7:** Emission intensity changes of **1** ( $2 \times 10^{-5}$  M in acetonitrile) upon addition of 1, 2, 3, 4, 5, 6, 7, 8, 9, 10 ppm of  $\text{Pb}^{2+}$ . The spectra were recorded after 3 min reaction time (a), Plot of emission intensity changes vs. concentration of  $\text{Pb}^{2+}$  at  $\lambda = 655$  (black balls) and 389 nm (red star) (b).

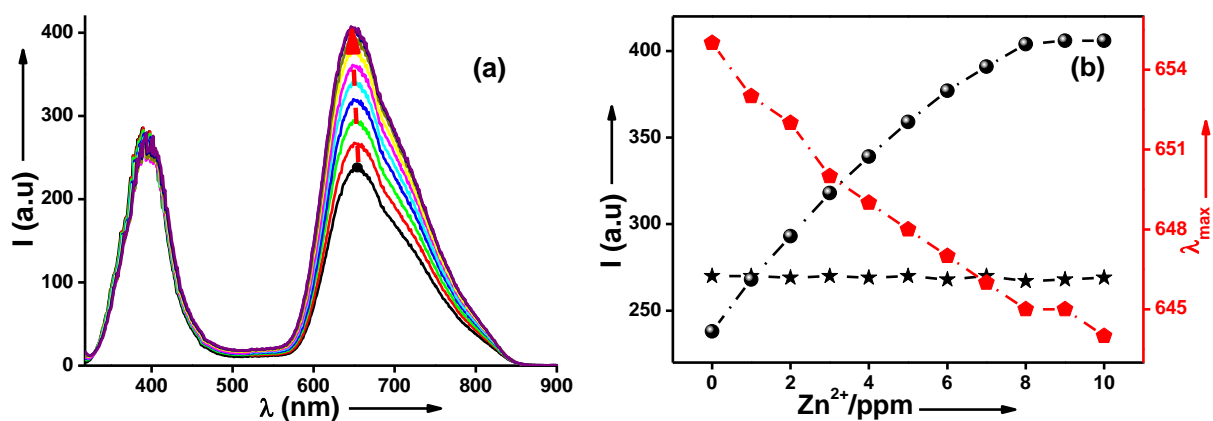

**Figure S8:** Emission intensity changes of **1** ( $2 \times 10^{-5}$  M in acetonitrile) upon addition of 1, 2, 3, 4, 5, 6, 7, 8, 9, 10 ppm of  $\text{Zn}^{2+}$ . The spectra were recorded after 3 min reaction time (a), Plot of intensity changes vs. concentration of  $\text{Zn}^{2+}$  at  $\lambda = 655$  (black balls) and 389 nm (red star).

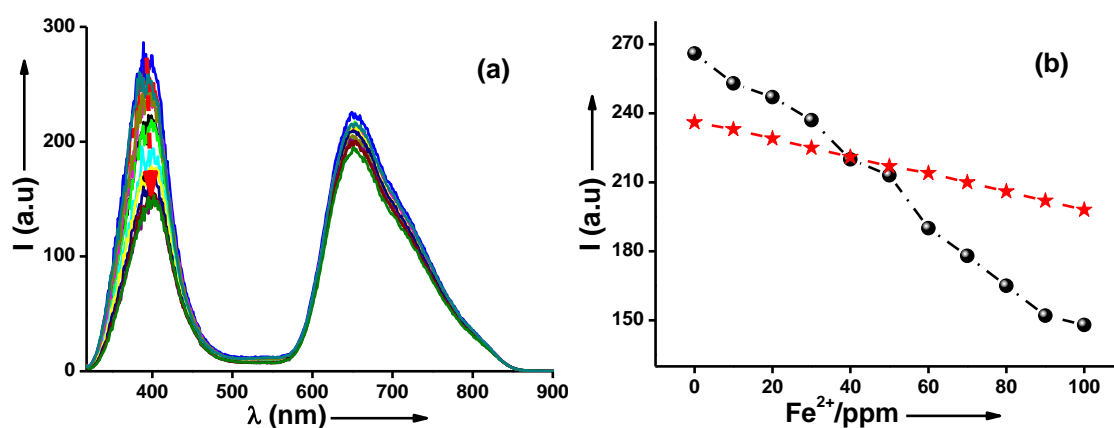

**Figure S9:** Emission intensity changes of **1** ( $2 \times 10^{-5}$  M in acetonitrile) upon addition of 1, 2, 3, 4, 5, 6, 7, 8, 9, 10 ppm of  $\text{Fe}^{2+}$ . The spectra were recorded after 3 min reaction time (a). Plot of emission intensity changes vs. concentration of  $\text{Fe}^{2+}$  at  $\lambda = 655$  (red star) and 389 nm (black balls) (b).

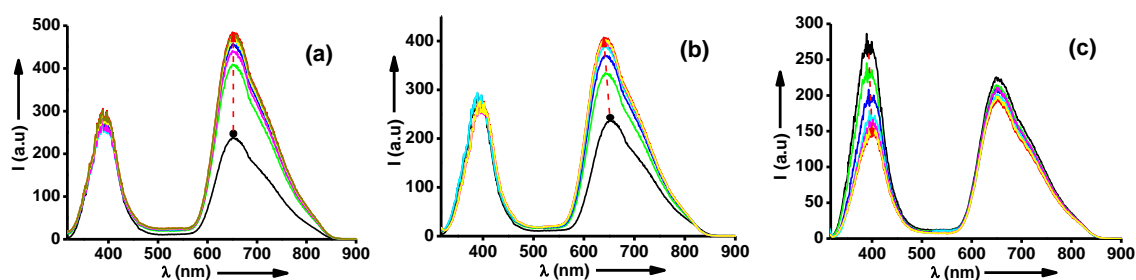

**Figure S10:** Emission intensity change of **1** ( $2 \times 10^{-5}$  M in acetonitrile) as a function of time upon addition of 10 ppm of  $\text{Pb}^{2+}$  (a) 10 ppm of  $\text{Zn}^{2+}$  (b) 100 ppm of  $\text{Fe}^{2+}$  (c). The spectra was taken after 30 sec in each experiment and saturation was achieved within  $\sim 3$  min.

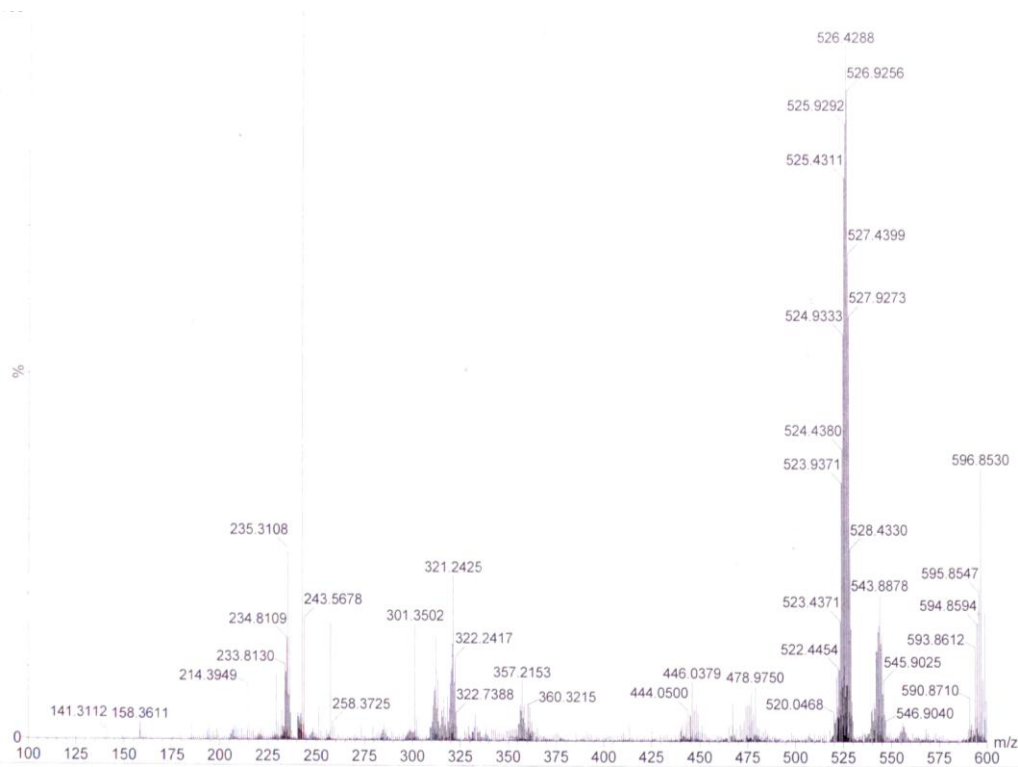

**Figure S11:** ESI-MS spectra of **1**+  $\text{Pb}^{2+}$  +  $\text{Zn}^{2+}$  showing possible fragmentation.



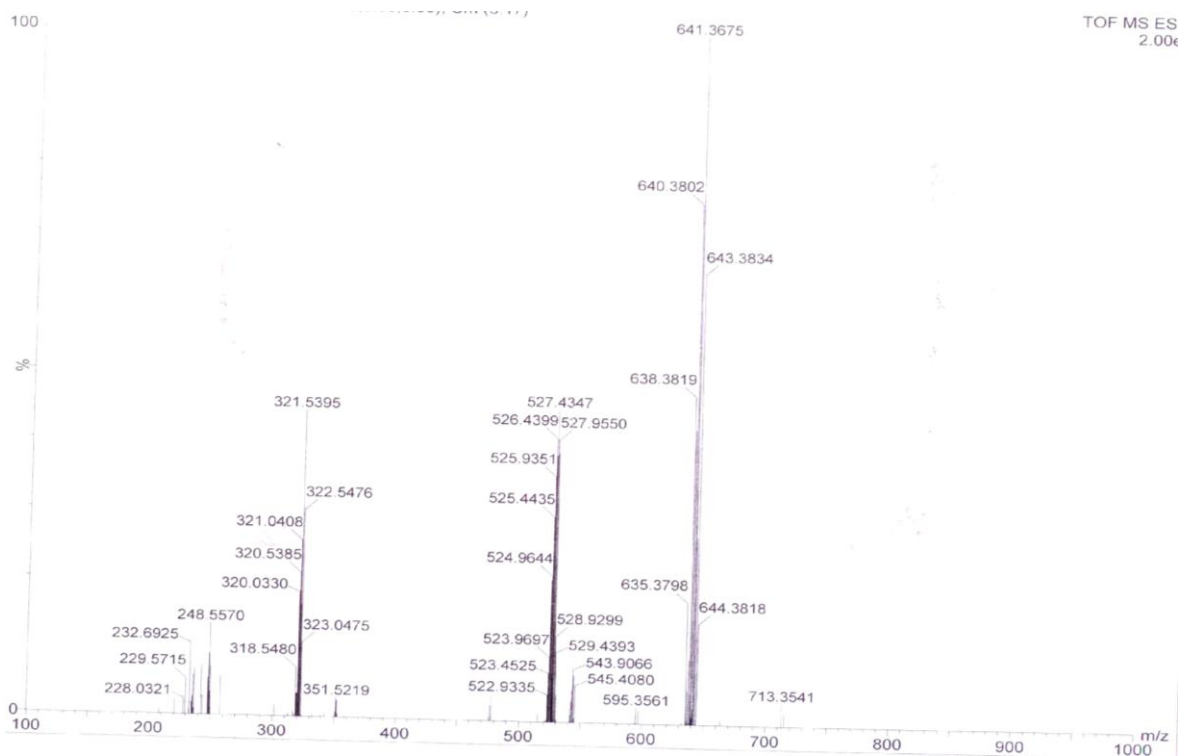

**Figure S12:** ESI-MS spectra of  $1+ \text{Pb}^{2+} + \text{Fe}^{2+}$  showing possible fragmentation.

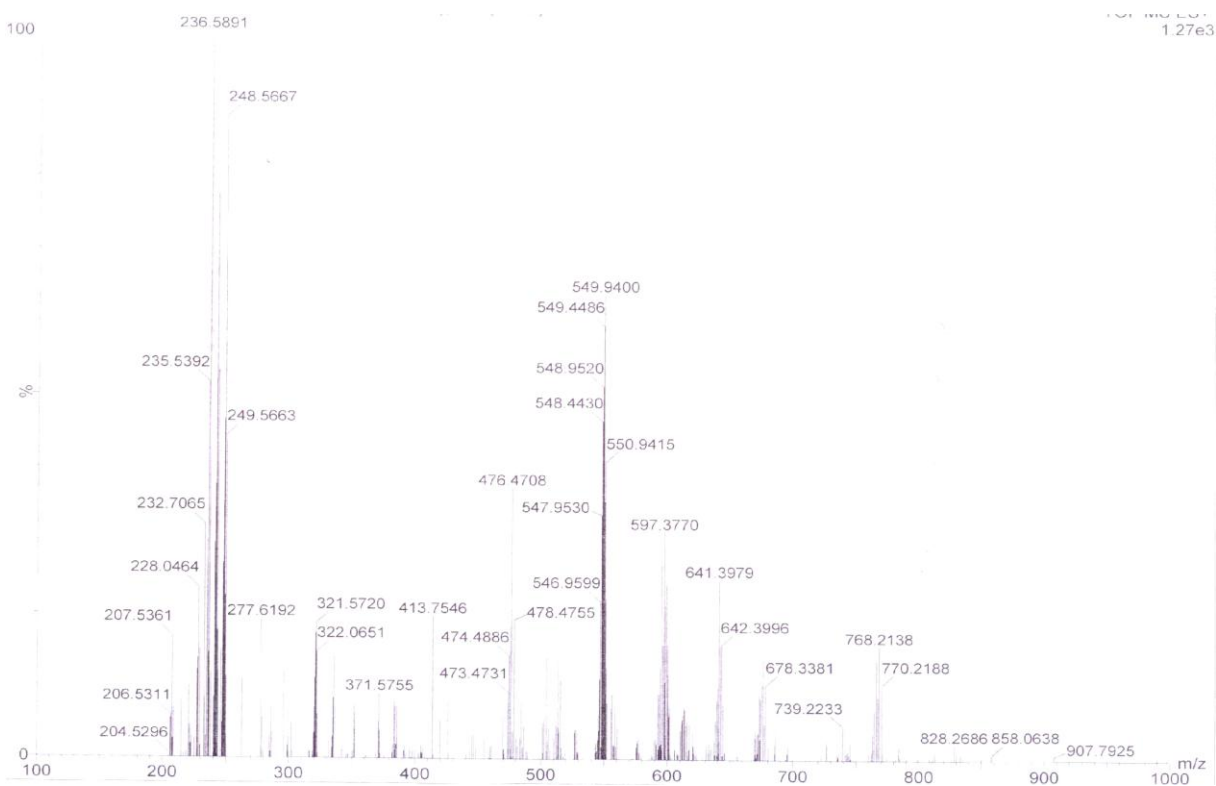

**Figure S13:** ESI-MS spectra of  $1+ \text{Zn}^{2+} + \text{Fe}^{2+}$  showing possible fragmentation.

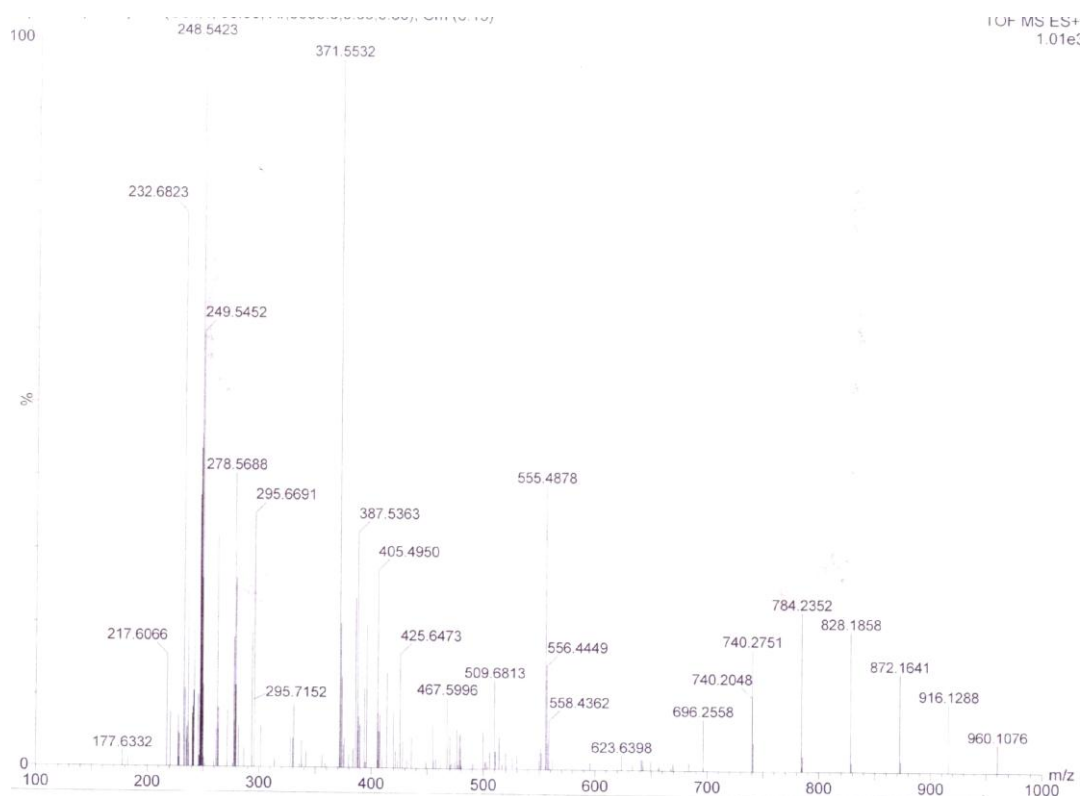

**Figure S14:** ESI-MS spectra of **1** +  $\text{Pb}^{2+}$  +  $\text{Zn}^{2+}$  +  $\text{Fe}^{2+}$  showing possible fragmentation.

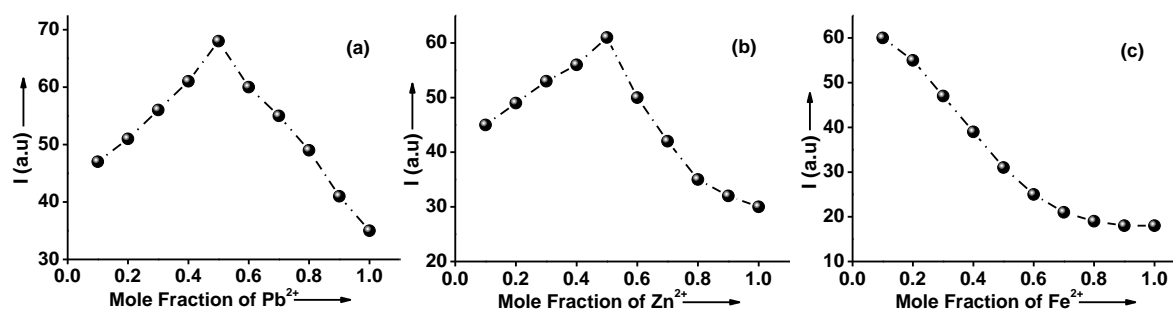

**Figure S15:** Job's plot for varying mole-fraction of metal-cations ( $1 \times 10^{-6}$  M) in **1** ( $1 \times 10^{-6}$  M in acetonitrile)  $\text{Pb}^{2+}$  (a),  $\text{Zn}^{2+}$  (b), and  $\text{Zn}^{2+}$  (c).

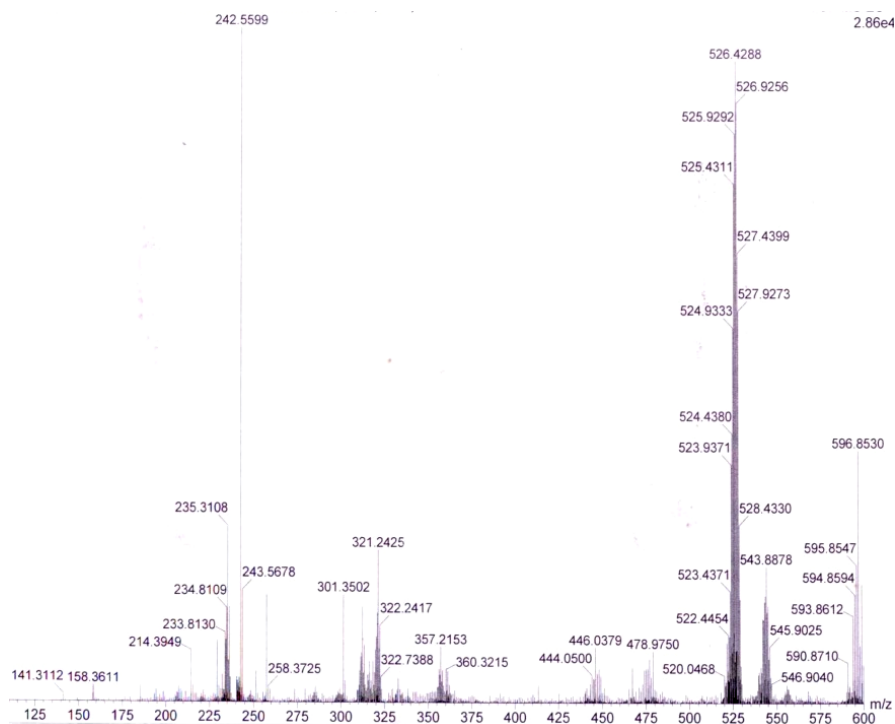

Figure S16: ESI-MS spectra of  $1+ \text{Pb}^{2+}$  showing possible fragmentation.

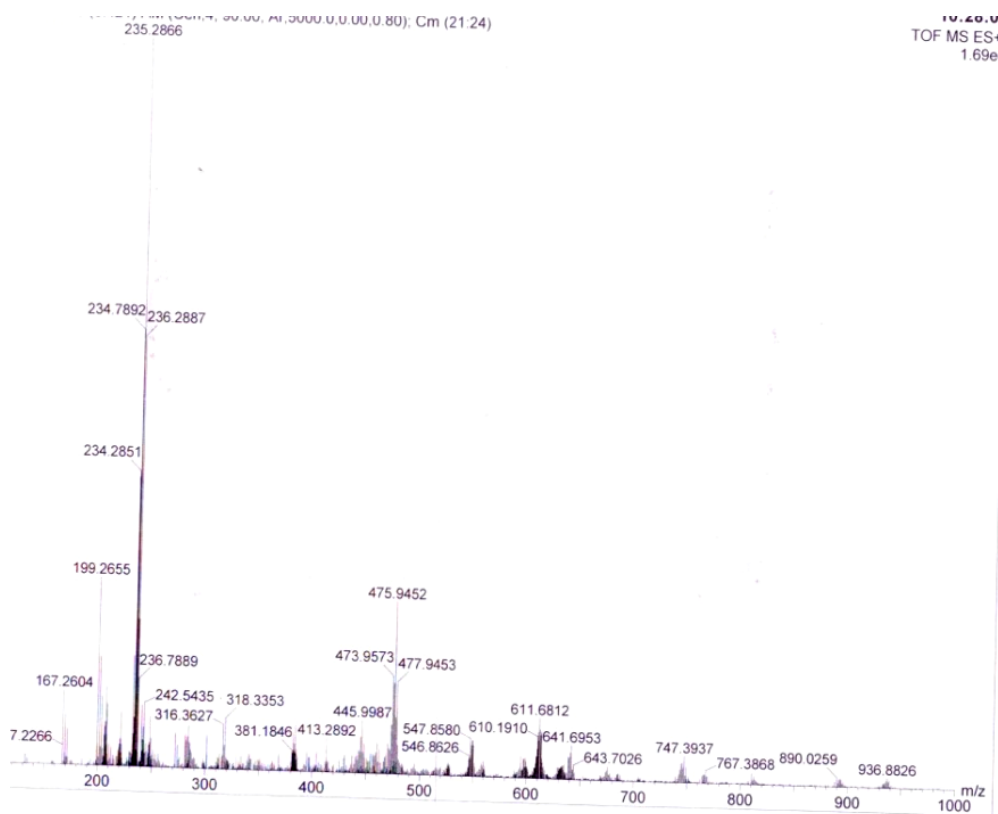

Figure S17: ESI-MS spectra of  $1+ \text{Zn}^{2+}$  showing possible fragmentation.

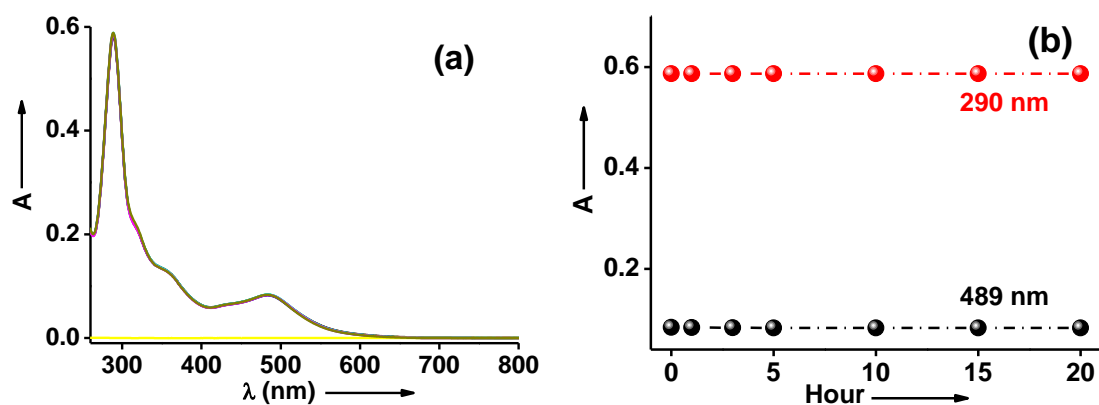

**Figure S18:** Representative UV-Vis spectra of **1** ( $0.85 \times 10^{-5}$  M in CH<sub>3</sub>CN) after exposing with sunlight for 20 hour (29 Nov. 2012, temp. 20-27<sup>0</sup>C, India).

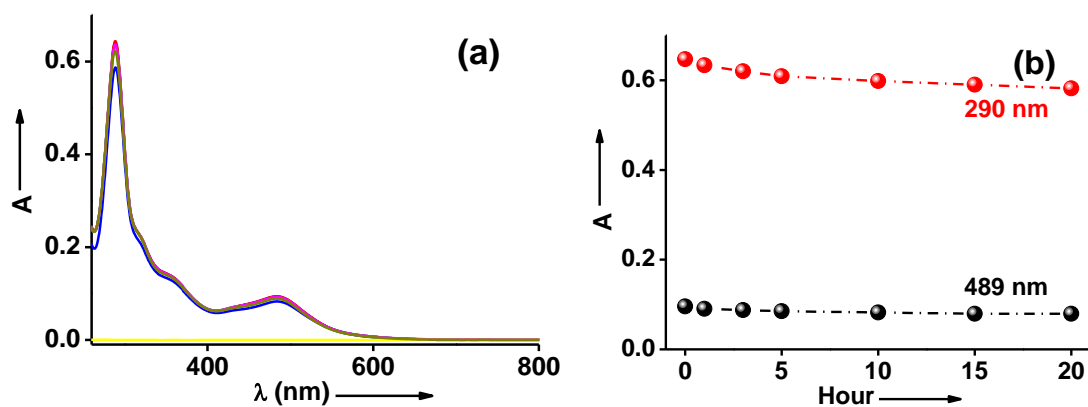

**Figure S19:** Representative UV-Vis spectra of **1** ( $0.85 \times 10^{-5}$  M in CH<sub>3</sub>CN) after exposing with UV-radiation for 20 hour (15 W, 356 nm).
